# Supplementary material
Source: PubMed Central journal article supplement (PMC4304871)
Supplement: NIHMS638129-supplement-3.pdf [file NIHMS638129-supplement-3.pdf]

|                                        | Peptide                                        | Sequence                        | N-terminus                        | MW           | M/3   |
|----------------------------------------|------------------------------------------------|---------------------------------|-----------------------------------|--------------|-------|
| Figure 1                               | MPER <sub>(662-683)</sub>                      | ELDKWASLWVNFNITNWLWYIK          | Biotin-PEG2-                      | 3,467        | 1,157 |
|                                        | MPER <sub>(662-683)</sub>                      | ELDKWASLWVNFNITNWLWYIK          | FITC-βAla-                        | 3,385        | 1,129 |
|                                        | SAH-MPER <sub>(662-683)</sub> (A)              | XLDKXASLWVNFNITNWLWYIK          | FITC-βAla-                        | 3,320        | 1,108 |
|                                        | SAH-MPER <sub>(662-683)</sub> (B)              | EXDKWXSLLWVNFNITNWLWYIK         | FITC-βAla-                        | 3,451        | 1,151 |
|                                        | SAH-MPER <sub>(662-683)</sub> (C)              | ELXKWAXLWVNFNITNWLWYIK          | FITC-βAla-                        | 3,433        | 1,145 |
|                                        | SAH-MPER <sub>(662-683)</sub> (D)              | ELDKWASXWVNFNITNWLWYIK          | FITC-βAla-                        | 3,394        | 1,132 |
|                                        | SAH-MPER <sub>(662-683)</sub> (E)              | ELDKXASLXWVNFNITNWLWYIK         | FITC-βAla-                        | 3,263        | 1,089 |
|                                        | SAH-MPER <sub>(662-683)</sub> (F)              | ELDKWASLWVNFNITNWLWYIK          | FITC-βAla-                        | 3,450        | 1,151 |
|                                        | SAH-MPER <sub>(662-683)</sub> (G)              | ELDKWASLWVNFNITNWLWYIK          | FITC-βAla-                        | 3,335        | 1,113 |
|                                        | SAH-MPER <sub>(662-683)</sub> (H)              | ELDKWASLWVNFNITNWLWYIK          | FITC-βAla-                        | 3,409        | 1,137 |
|                                        | SAH-MPER <sub>(662-683)</sub> (I)              | ELDKWASLWVNFNITNWLWYIK          | FITC-βAla-                        | 3,348        | 1,117 |
|                                        | SAH-MPER <sub>(662-683)</sub> (J)              | ELDKWASLWVNFNITNWLWYIK          | FITC-βAla-                        | 3,358        | 1,120 |
|                                        | SAH-MPER <sub>(662-683)</sub> (K)              | ELDKWASLWVNFNITNWLWYIK          | FITC-βAla-                        | 3,336        | 1,113 |
|                                        | SAH-MPER <sub>(662-683)</sub> (L)              | ELDKWASLWVNFNITNWLWYIK          | FITC-βAla-                        | 3,394        | 1,132 |
|                                        | SAH-MPER <sub>(662-683)</sub> (M)              | ELDKWASLWVNFNITNWLWYIK          | FITC-βAla-                        | 3,407        | 1,137 |
|                                        | SAH-MPER <sub>(662-683)</sub> (N)              | ELDKWASLWVNFNITNWLWYIK          | FITC-βAla-                        | 3,336        | 1,113 |
|                                        | SAH-MPER <sub>(662-683)</sub> (O)              | ELDKWASLWVNFNITNWLWYIK          | FITC-βAla-                        | 3,421        | 1,141 |
|                                        | SAH-MPER <sub>(662-683)</sub> (P)              | ELDKWASLWVNFNITNWLWYIK          | FITC-βAla-                        | 3,335        | 1,113 |
|                                        | SAH-MPER <sub>(662-683)</sub> (Q)              | ELDKWASLWVNFNITNWLWYIK          | FITC-βAla-                        | 3,286        | 1,096 |
| SAH-MPER <sub>(662-683)</sub> (R)      | ELDKWASLWVNFNITNWLWYIK                         | FITC-βAla-                      | 3,409                             | 1,137        |       |
| SAH-MPER <sub>(662-683)</sub> (S)      | ELDKWASLWVNFNITNWLWYIK                         | FITC-βAla-                      | 3,321                             | 1,108        |       |
| Figure 2                               | MPER <sub>(671-683KKK)</sub>                   | NWFNITNWLWYIKKKK                | Ac-                               | 2,222        | 742   |
|                                        | SAH-MPER <sub>(671-683KKK)</sub> (Q)           | NWFNITNWLWYIKKKK                | Ac-                               | 2,123        | 709   |
|                                        | SAH-MPER <sub>(671-683KKK)</sub> (q)           | NWFNITNWLWYIKKKK                | Ac-                               | 2,095        | 699   |
| Figure 3                               | SAH-MPER <sub>(671-683KKK)</sub> (q)           | NWFNITNWLWYIKKKK                | Ac-                               | 2,095        | 699   |
| Figure 5                               | SAH-MPER <sub>(671-683KKK)</sub> (q)pSer       | NWFNITNWLWYIKKKK                | Ac-                               | 2,291        | 765   |
| Figure 6                               | SAH-MPER <sub>(662-683)</sub> (q)              | ELDKWASLWVNFNITNWLWYIK          | FITC-βAla-                        | 3,258        | 1,087 |
|                                        | SAH-MPER <sub>(662-683)</sub> (A,q)            | XLDKXASLWVNFNITNWLWYIK          | FITC-βAla-                        | 3,194        | 1,066 |
|                                        | SAH-MPER <sub>(662-683)</sub> (B,q)            | EXDKWXSLLWVNFNITNWLWYIK         | FITC-βAla-                        | 3,325        | 1,109 |
|                                        | SAH-MPER <sub>(662-683)</sub> (C,q)            | ELXKWAXLWVNFNITNWLWYIK          | FITC-βAla-                        | 3,307        | 1,103 |
|                                        | SAH-MPER <sub>(662-683)</sub> (D,q)            | ELDKWASXWVNFNITNWLWYIK          | FITC-βAla-                        | 3,268        | 1,090 |
|                                        | SAH-MPER <sub>(662-683)</sub> (E,q)            | ELDKXASLXWVNFNITNWLWYIK         | FITC-βAla-                        | 3,136        | 1,046 |
|                                        | MPER <sub>(662-683KKK)</sub>                   | ELDKWASLWVNFNITNWLWYIKKKK       | Ac-                               | 3,351        | 1,118 |
|                                        | SAH-MPER <sub>(662-683KKK)</sub> (q)           | ELDKWASLWVNFNITNWLWYIKKKK       | Ac-                               | 3,224        | 1,076 |
|                                        | SAH-MPER <sub>(662-683KKK)</sub> (A,q)         | XLDKXASLWVNFNITNWLWYIKKKK       | Ac-                               | 3,159        | 1,054 |
|                                        | SAH-MPER <sub>(662-683KKK)</sub> (B,q)         | EXDKWXSLLWVNFNITNWLWYIKKKK      | Ac-                               | 3,290        | 1,098 |
|                                        | SAH-MPER <sub>(662-683KKK)</sub> (C,q)         | ELXKWAXLWVNFNITNWLWYIKKKK       | Ac-                               | 3,272        | 1,092 |
|                                        | SAH-MPER <sub>(662-683KKK)</sub> (D,q)         | ELDKWASXWVNFNITNWLWYIKKKK       | Ac-                               | 3,233        | 1,079 |
|                                        | SAH-MPER <sub>(662-683KKK)</sub> (E,q)         | ELDKXASLXWVNFNITNWLWYIKKKK      | Ac-                               | 3,102        | 1,035 |
|                                        | Figure 7                                       | MPER <sub>(RRR656-683RRR)</sub> | RRRNEQELLEDKWASLWVNFNITNWLWYIRRRR | Biotin-PEG2- | 5,161 |
| MPER <sub>(662-683)</sub>              |                                                | ELDKWASLWVNFNITNWLWYIK          | FITC-βAla-                        | 3,385        | 1,129 |
| SAH-MPER <sub>(662-683)</sub> (q)      |                                                | ELDKWASLWVNFNITNWLWYIK          | FITC-βAla-                        | 3,258        | 1,087 |
| SAH-MPER <sub>(662-683)</sub> (A,q)    |                                                | XLDKXASLWVNFNITNWLWYIK          | FITC-βAla-                        | 3,194        | 1,066 |
| SAH-MPER <sub>(662-683)</sub> (B,q)    |                                                | EXDKWXSLLWVNFNITNWLWYIK         | FITC-βAla-                        | 3,325        | 1,109 |
| SAH-MPER <sub>(662-683)</sub> (C,q)    |                                                | ELXKWAXLWVNFNITNWLWYIK          | FITC-βAla-                        | 3,307        | 1,103 |
| SAH-MPER <sub>(662-683)</sub> (D,q)    |                                                | ELDKWASXWVNFNITNWLWYIK          | FITC-βAla-                        | 3,268        | 1,090 |
| SAH-MPER <sub>(662-683)</sub> (E,q)    |                                                | ELDKXASLXWVNFNITNWLWYIK         | FITC-βAla-                        | 3,136        | 1,046 |
| SAH-MPER <sub>(662-683KKK)</sub> (B,q) |                                                | EXDKWXSLLWVNFNITNWLWYIKKKK      | Ac-                               | 3,290        | 1,054 |
| SAH-MPER <sub>(671-683KKK)</sub> (q)   |                                                | NWFNITNWLWYIKKKK                | Ac-                               | 2,095        | 699   |
| Supp                                   |                                                | MPER <sub>(662-683KKK)</sub>    | NWFNITNWLWYIKKKK                  | Ac-          | 2,222 |
|                                        | SAH-MPER <sub>(662-683KKK)</sub> (q)           | NWFNITNWLWYIKKKK                | Ac-                               | 2,095        | 699   |
|                                        | SAH-MPER <sub>(662-683KKK)</sub> (q)pSer(*683) | NWFNITNWLWYIKKKK                | Ac-                               | 2,291        | 765   |
|                                        | SAH-MPER <sub>(662-683KKK)</sub> (q)pSer(*685) | NWFNITNWLWYIKKKK                | Ac-                               | 2,291        | 765   |
|                                        | SAH-MPER <sub>(662-683KKK)</sub> (q)           | ELDKWASLWVNFNITNWLWYIKKKK       | Ac-                               | 3,224        | 1,076 |
|                                        | SAH-MPER <sub>(662-683KKK)</sub> (D,q)         | ELDKWASXWVNFNITNWLWYIKKKK       | Ac-                               | 3,233        | 1,079 |
| SAH-MPER <sub>(662-683KKK)</sub> (B,q) | EXDKWXSLLWVNFNITNWLWYIKKKK                     | Ac-                             | 3,290                             | 1,054        |       |

**Supplementary Table 1. MPER Peptide Compositions**

| gp41 Residue Range |     | RMSD* (Å)  |                        |
|--------------------|-----|------------|------------------------|
|                    |     | C $\alpha$ | All Atoms <sup>+</sup> |
| 668                | 683 | 2.4        | 3.3                    |
| 669                | 683 | 1.6        | 2.7                    |
| 670                | 683 | 0.6        | 1.8                    |
| 671                | 683 | 0.6        | 1.0                    |
| 672                | 683 | 0.5        | 1.0                    |

\* Comparison of atoms in native and stapled peptide chains P.

<sup>+</sup> Excluding atoms unique to S5 and R3.

**Supplementary Table 2. C $\alpha$  and all atom RMSDs comparing SAH-MPER<sub>(662-683KKK)</sub>(B,q) and MPER<sub>(RRR656-683RRR)</sub> peptides for residue ranges between 668-683.**

A

|       |                  | 10E8-SAH-MPER <sub>(662-683KKK)</sub> (B,q) |                                       |                        | MPER <sub>(RRR656-683RRR)</sub>       |                                       |                        |
|-------|------------------|---------------------------------------------|---------------------------------------|------------------------|---------------------------------------|---------------------------------------|------------------------|
| Chain | Residue          | ASA <sup>‡</sup><br>(Å <sup>2</sup> )       | BSA <sup>§</sup><br>(Å <sup>2</sup> ) | %<br>BSA <sup>§§</sup> | ASA <sup>‡</sup><br>(Å <sup>2</sup> ) | BSA <sup>§</sup><br>(Å <sup>2</sup> ) | %<br>BSA <sup>§§</sup> |
| gp41  | P:SER668         | 127                                         | 1                                     |                        | 83                                    | 34                                    |                        |
|       | P:LEU 669        | 145                                         |                                       |                        | 131                                   | 39                                    |                        |
|       | P:TRP670         | 233                                         | 36                                    |                        | 137                                   | 10                                    |                        |
|       | P:ASN671         | 73                                          | 31                                    |                        | 73                                    | 32                                    |                        |
|       | P:TRP672         | 178                                         | 129                                   |                        | 179                                   | 139                                   |                        |
|       | P:PHE673         | 163                                         | 85                                    |                        | 148                                   | 93                                    |                        |
|       | P:ASP674         | 85                                          |                                       |                        | 67                                    |                                       |                        |
|       | P:ILE 675        | 74                                          |                                       |                        | 46                                    |                                       |                        |
|       | P:THR676         | 54                                          | 53                                    |                        | 49                                    | 49                                    |                        |
|       | P:ASN677         | 123                                         | 11                                    |                        | 99                                    | 19                                    |                        |
|       | P:R3 (678)       |                                             |                                       |                        | 144                                   |                                       |                        |
|       | P:LEU 679        | 127                                         | 56                                    |                        | 108                                   | 50                                    |                        |
|       | P:TRP680         | 169                                         | 88                                    |                        | 131                                   | 66                                    |                        |
|       | P:S5 (681)       |                                             |                                       |                        | 103                                   |                                       |                        |
|       | P:ILE 682        | 160                                         | 11                                    |                        | 119                                   | 15                                    |                        |
|       | P:LYS 683        | 155                                         | 74                                    |                        | 183                                   | 108                                   |                        |
|       | 10E8 Heavy Chain | H:ASN 31                                    |                                       |                        |                                       | 86                                    | 17                     |
|       | H:TRP 33         | 30                                          | 26                                    |                        | 33                                    | 31                                    |                        |
|       | H:ARG 50         | 26                                          | 11                                    |                        | 14                                    | 5                                     |                        |
|       | H:THR 52         | 3                                           | 3                                     |                        | 5                                     | 5                                     |                        |
|       | H:PRO 52B        | 65                                          | 1                                     |                        | 70                                    | 30                                    |                        |
|       | H:GLY 52C        | 73                                          | 53                                    |                        | 74                                    | 60                                    |                        |
|       | H:GLU 53         | 80                                          | 55                                    |                        | 79                                    | 58                                    |                        |
|       | H:SER 56         | 52                                          | 6                                     |                        | 53                                    | 7                                     |                        |
|       | H:ASP 58         | 68                                          | 3                                     |                        | 72                                    | 7                                     |                        |
|       | H:LYS 97         | 115                                         | 43                                    |                        | 111                                   | 40                                    |                        |
|       | H:TYR 98         | 121                                         | 4                                     |                        | 118                                   | 4                                     |                        |
|       | H:TYR 99         | 111                                         | 78                                    |                        | 111                                   | 82                                    |                        |
|       | H:PHE 100A       | 151                                         | 78                                    |                        | 155                                   | 87                                    |                        |
|       | H:TRP 100B       | 225                                         | 45                                    |                        | 225                                   | 29                                    |                        |
|       | H:SER 100C       | 94                                          | 1                                     |                        | 93                                    | 6                                     |                        |
|       | H:GLY 100D       | 23                                          | 11                                    |                        | 26                                    | 17                                    |                        |
|       | H:TYR 100E       | 170                                         | 33                                    |                        | 179                                   | 26                                    |                        |
|       | H:PRO 100F       | 82                                          | 56                                    |                        | 88                                    | 64                                    |                        |
|       | H:PRO 100G       | 140                                         | 69                                    |                        | 133                                   | 65                                    |                        |
|       | H:GLY 100H       | 91                                          | 1                                     |                        |                                       |                                       |                        |
|       | H:GLU 100I       | 65                                          | 3                                     |                        | 98                                    | 1                                     |                        |
|       | H:GLU 100J       | 151                                         | 78                                    |                        | 57                                    | 6                                     |                        |

\*All interactions were performed with PISA ([http://www.ebi.ac.uk/msd-srv/prot\\_int/cgi-bin/piserver](http://www.ebi.ac.uk/msd-srv/prot_int/cgi-bin/piserver)).

‡ASA, Accessible Surface Area, Å<sup>2</sup>.

§BSA, Buried Surface Area, Å<sup>2</sup>.

§§Bars represent buried area percentage (100 x BSA/ASA), one bar per 10%.

Data shown are for Chain H, L, and P of the 10E8-SAH-MPER (B,q) structure and chains B, D, and F of the MPER<sub>(RRR656-683RRR)</sub> structure.

B

|                  |           | 10E8-SAH-MPER <sub>(662-683KKK)</sub> (B,q) |                                       |                        | MPER <sub>(RRR656-683RRR)</sub>       |                                       |                        |
|------------------|-----------|---------------------------------------------|---------------------------------------|------------------------|---------------------------------------|---------------------------------------|------------------------|
| Chain            | Residue   | ASA <sup>‡</sup><br>(Å <sup>2</sup> )       | BSA <sup>§</sup><br>(Å <sup>2</sup> ) | %<br>BSA <sup>§§</sup> | ASA <sup>‡</sup><br>(Å <sup>2</sup> ) | BSA <sup>§</sup><br>(Å <sup>2</sup> ) | %<br>BSA <sup>§§</sup> |
| gp41             | P:TRP672  | 178                                         | 6                                     |                        | 179                                   | 12                                    |                        |
|                  | P:PHE673  | 163                                         | 52                                    |                        | 148                                   | 52                                    |                        |
| 10E8 Light Chain | L:ARG 91  | 87                                          | 10                                    |                        | 84                                    | 16                                    |                        |
|                  | L:ARG 95B | 224                                         | 46                                    |                        | 226                                   | 55                                    |                        |

\*All interactions were performed with PISA ([http://www.ebi.ac.uk/msd-srv/prot\\_int/cgi-bin/piserver](http://www.ebi.ac.uk/msd-srv/prot_int/cgi-bin/piserver)).

‡ASA, Accessible Surface Area, Å<sup>2</sup>.

§BSA, Buried Surface Area, Å<sup>2</sup>. Bars represent buried area percentage, one bar per 10%.

§§Bars represent buried area percentage (100 x BSA/ASA), one bar per 10%.

Data shown are for Chain H, L, and P of the 10E8-SAH-MPER<sub>(662-683KKK)</sub> (B,q) structure and chains A, B, and C of the MPER<sub>(RRR656-683RRR)</sub> structure.

**Supplementary Table 3. Comparison of buried surface areas at the interface between SAH-MPER<sub>(662-683KKK)</sub>(B,q) and MPER<sub>(RRR656-683RRR)</sub> peptides and (A) 10E8 heavy chain and (B) 10E8 light chain.**
